# Supplementary material
Source: MDPI journal article supplement (https://www.mdpi.com/2227-9717/11/4/1029)
Supplement: s1 [file s1 › processes-2272461-supplementary.pdf]

## Supplementary Materials

### Engineered Biomaterials for Reducing Phosphorus and Nitrogen Levels from Downstream Water of Aquaculture Facilities

W. F. Rance Bare <sup>1</sup>, Ethan Struhs <sup>2</sup>, Amin Mirkouei <sup>1,2,\*,†</sup>, Kenneth Overturf <sup>3,4</sup> and Brian Small <sup>4,5</sup>

<sup>1</sup> Department of Biological Engineering, University of Idaho, Idaho Falls, ID 83402, USA

<sup>2</sup> Department of Mechanical Engineering, University of Idaho, Idaho Falls, ID 83402, USA

<sup>3</sup> Agricultural Research Service, United States Department of Agriculture, Hagerman, ID 83332, USA

<sup>4</sup> Aquaculture Research Institute, University of Idaho, Hagerman, ID 83332, USA

<sup>5</sup> Department of Fish and Wildlife Sciences, University of Idaho, Hagerman, ID 83332, USA

\* Correspondence: amirkouei@uidaho.edu

† Current address: Tingey Administration Building, Suite 312, University of Idaho, Idaho Falls, ID 83402, USA.

#### Nomenclature

##### Indices

|            |                                  |
|------------|----------------------------------|
| <i>a</i>   | Set of collection sites          |
| <i>b</i>   | Set of conversion sites          |
| <i>bs</i>  | Biomaterial storage              |
| <i>c</i>   | Set of biomaterial storage sites |
| <i>col</i> | Collection                       |
| <i>d</i>   | Set of bio-oil storage sites     |
| <i>di</i>  | Distribution                     |
| <i>dr</i>  | Dryer                            |
| <i>e</i>   | Set of water treatment sites     |
| <i>gr</i>  | Grinding                         |
| <i>os</i>  | Bio-oil storage                  |
| <i>ppb</i> | Parts per billion                |
| <i>pyr</i> | Pyrolysis                        |
| <i>t</i>   | Set of time                      |

##### Parameters

|             |                                                                                           |
|-------------|-------------------------------------------------------------------------------------------|
| $C_{C-col}$ | Annual capital cost of collection (\$/yr)                                                 |
| $C_{C-bs}$  | Annual capital cost of biomaterial storage (\$/yr)                                        |
| $C_{C-dr}$  | Annual capital cost of drying (\$/yr)                                                     |
| $C_{C-gr}$  | Annual capital cost of grinding (\$/yr)                                                   |
| $C_{C-os}$  | Annual capital cost of bio-oil storage (\$/yr)                                            |
| $C_{C-pyr}$ | Annual capital cost of pyrolysis (\$/yr)                                                  |
| $C_{C-di}$  | Annual capital cost of distribution (\$/yr)                                               |
| $C_{C-wt}$  | Annual capital cost of water treatment (\$/yr)                                            |
| $C_{V-col}$ | Annual variable cost of collection (\$/yr)                                                |
| $C_{V-bs}$  | Annual variable cost of biomaterial storage (\$/yr)                                       |
| $C_{V-dr}$  | Annual variable cost of drying (\$/yr)                                                    |
| $C_{V-gr}$  | Annual variable cost of grinding (\$/yr)                                                  |
| $C_{V-os}$  | Annual variable cost of bio-oil storage (\$/yr)                                           |
| $C_{V-pyr}$ | Annual variable cost of pyrolysis (\$/yr)                                                 |
| $C_{V-di}$  | Annual variable cost of distribution (\$/yr)                                              |
| $C_{V-wt}$  | Annual variable cost of water treatment (\$/yr)                                           |
| $D$         | Distance (km)                                                                             |
| $EP$        | Total pathway eutrophication (kg PO <sub>4</sub> eq.)                                     |
| $EP_{N2O}$  | Eutrophication potential of N <sub>2</sub> O (kg PO <sub>4</sub> eq./kg N <sub>2</sub> O) |

## Supplementary Materials

|               |                                                                                                    |
|---------------|----------------------------------------------------------------------------------------------------|
| $EP_P$        | Eutrophication potential of P (kg PO <sub>4</sub> eq./kg P)                                        |
| $EP_{EF}$     | Eutrophication potential for all processes (kg PO <sub>4</sub> /ton)                               |
| $EP_{EFN_2O}$ | N <sub>2</sub> O eutrophication potential of all processes (kg N <sub>2</sub> O/ ton)              |
| $EP_{EFP}$    | P eutrophication potential of all processes (kg P/ton)                                             |
| $ER_{CH_4}$   | Emissions rate of CH <sub>4</sub> (kg CO <sub>2</sub> eq./kg CH <sub>4</sub> )                     |
| $ER_{CO_2}$   | Emissions rate of CO <sub>2</sub> (kg CO <sub>2</sub> eq./kg CO <sub>2</sub> )                     |
| $ER_{N_2O}$   | Emissions rate of N <sub>2</sub> O (kg CO <sub>2</sub> eq./kg N <sub>2</sub> O)                    |
| $M_{bc}$      | Mass of produced biomaterial (metric ton)                                                          |
| $M_p$         | Mass of raw pinewood (metric ton)                                                                  |
| $MS_{EF}$     | GHG emissions factor for biomaterial production process (kg CO <sub>2</sub> eq. per ton)           |
| $MS_{EFCH_4}$ | CH <sub>4</sub> emission factor for biomaterial production process (kg CH <sub>4</sub> per ton)    |
| $MS_{EFCO_2}$ | CO <sub>2</sub> emission factor for biomaterial production process (kg CO <sub>2</sub> per ton)    |
| $MS_{EFN_2O}$ | N <sub>2</sub> O emission factor for biomaterial production process (kg N <sub>2</sub> O per ton)  |
| $MS_{GWP}$    | Biomaterial production GWP (kg CO <sub>2</sub> eq.)                                                |
| $TR_{EF}$     | GHG emissions factor for biomaterial transportation (kg CO <sub>2</sub> eq. per ton-mile)          |
| $TR_{EFCH_4}$ | CH <sub>4</sub> emission factor for biomaterial transportation (kg CH <sub>4</sub> per ton-mile)   |
| $TR_{EFCO_2}$ | CO <sub>2</sub> emission factor for biomaterial transportation (kg CO <sub>2</sub> per ton-mile)   |
| $TR_{EFN_2O}$ | N <sub>2</sub> O emission factor for biomaterial transportation (kg N <sub>2</sub> O per ton-mile) |
| $TR_{GWP}$    | Biomaterial transportation GWP (kg CO <sub>2</sub> eq.)                                            |
| $U_{pyr}$     | Annual pyrolysis utilization (metric ton/yr)                                                       |
| $U_{dr}$      | Annual drying equipment utilization (metric ton/yr)                                                |
| $U_{gr}$      | Annual grinder utilization (metric ton/yr)                                                         |
| $U_{wt}$      | Annual water treatment utilization (metric ton/yr)                                                 |
| $U_{os}$      | Annual bio-oil storage equipment utilization (metric ton/yr)                                       |
| $U_{bs}$      | Annual biomaterial storage equipment utilization (metric ton/yr)                                   |
| $U_{col}$     | Annual handling equipment utilization (metric ton/yr)                                              |
| $U_{di}$      | Annual distribution utilization (metric ton/yr)                                                    |
| $US_{EF}$     | GHG emissions factor for upstream processes (kg CO <sub>2</sub> eq. per ton)                       |
| $US_{EFCH_4}$ | CH <sub>4</sub> emission factor for upstream processes (kg CH <sub>4</sub> per ton)                |
| $US_{EFCO_2}$ | CO <sub>2</sub> emission factor for upstream processes (kg CO <sub>2</sub> per ton)                |
| $US_{EFN_2O}$ | N <sub>2</sub> O emission factor for upstream processes (kg N <sub>2</sub> O per ton)              |
| $US_{GWP}$    | Upstream processes GWP (kg CO <sub>2</sub> eq.)                                                    |

### Decision Variables

|            |                                                                                                                             |
|------------|-----------------------------------------------------------------------------------------------------------------------------|
| $B_{bct}$  | Integer variable for biomaterial mass from conversion site b to storage site c during time period t (metric ton)            |
| $B_{cet}$  | Integer variable for biomaterial mass from storage site c to water treatment site e during time period t (metric ton)       |
| $BN_{cet}$ | Continuous variable for biomaterial mass from conversion site b to water treatment site e during time period t (metric ton) |
| $O_{bdt}$  | Integer variable for bio-oil mass from conversion site b to storage site d during time period t (metric ton)                |
| $PN_{abt}$ | Continuous variable for pinewood mass from collection site a to conversion site b during time period t (metric ton)         |
| $Z_{abt}$  | Binary variable for forest residue from collection site a to conversion site b during time period t                         |
